# Supplementary material
Source: Research Square preprint supplement (doi:10.21203/rs.3.rs-7528753/v1)
Supplement: Supplementary file 1 [file 0e809837b9d181caddf0817f.pdf]

## IN DEPTH INTERVIEW GUIDE

|                                                                                                                                                                        |                                                                                                                                                                                                                                                                                                                                                                                                                                                                                                                                                                                 |
|------------------------------------------------------------------------------------------------------------------------------------------------------------------------|---------------------------------------------------------------------------------------------------------------------------------------------------------------------------------------------------------------------------------------------------------------------------------------------------------------------------------------------------------------------------------------------------------------------------------------------------------------------------------------------------------------------------------------------------------------------------------|
| <i>Target: Community leaders (Village chief, Ethnic group representatives), Youth leaders (men/women), Religious leaders</i>                                           |                                                                                                                                                                                                                                                                                                                                                                                                                                                                                                                                                                                 |
| <b>Research objectives/questions</b>                                                                                                                                   | <b>Themes covered/relaunch</b>                                                                                                                                                                                                                                                                                                                                                                                                                                                                                                                                                  |
| <b>General information</b>                                                                                                                                             |                                                                                                                                                                                                                                                                                                                                                                                                                                                                                                                                                                                 |
| Age:                                                                                                                                                                   | Profession:                                                                                                                                                                                                                                                                                                                                                                                                                                                                                                                                                                     |
| Sexe:                                                                                                                                                                  | Education level:                                                                                                                                                                                                                                                                                                                                                                                                                                                                                                                                                                |
| <b>Attitude towards wounds in the community</b>                                                                                                                        |                                                                                                                                                                                                                                                                                                                                                                                                                                                                                                                                                                                 |
| What do attitudes towards wounds look like currently in your community, compared with before the CHW-based wound management approach was implemented in your locality? | <p>How are wounds currently perceived or considered in your community?</p> <p>What are currently community care practices toward wounds in your area?</p> <p>What is the current state of self-medication and the use of traditional therapists in your locality?</p> <p>Have perceptions around wounds and care seeking behaviors related to wounds changed or not since th CHW-based wound management approach has been implemented?</p> <p><i>(Describe any change observed in attitudes in the community and related to the CHW based wound management implemented)</i></p> |
| <b>Perception of wound care provided by CHWs</b>                                                                                                                       |                                                                                                                                                                                                                                                                                                                                                                                                                                                                                                                                                                                 |
| How do you perceive community health workers and their involvement in health issues?                                                                                   | <p>Perception of CHWs</p> <ul style="list-style-type: none"> <li>• Access</li> <li>• Availability</li> <li>• Relationship</li> <li>• Confidence</li> </ul>                                                                                                                                                                                                                                                                                                                                                                                                                      |
| What is your perception of wound care provided at community level by CHWs within the wound management model established in your area?                                  | <p>Perception of CHWs wound care</p> <ul style="list-style-type: none"> <li>• Efficacy</li> <li>• Duration of care</li> <li>• Confidence</li> </ul> <p>How do you perceive community-based wound care with CHWs compared to care in standard health services (health center, district hospital)?</p>                                                                                                                                                                                                                                                                            |
| When do you or community members most often seek care from community health workers in your area?                                                                      | <p>Recourse to CHWs care</p> <ul style="list-style-type: none"> <li>• Compliance with care</li> <li>• Self-recourse to CHWs</li> <li>• Decision criteria to seek care from CHWs</li> </ul>                                                                                                                                                                                                                                                                                                                                                                                      |
| <b>Perceived benefits of the treatment</b>                                                                                                                             |                                                                                                                                                                                                                                                                                                                                                                                                                                                                                                                                                                                 |

|                                                                                                                                                                              |                                                                                                                                                                                                                                                                                                                                                         |
|------------------------------------------------------------------------------------------------------------------------------------------------------------------------------|---------------------------------------------------------------------------------------------------------------------------------------------------------------------------------------------------------------------------------------------------------------------------------------------------------------------------------------------------------|
| Has CHW-based wound management made a difference your community regarding wounds issues?                                                                                     | How is this perceptible?                                                                                                                                                                                                                                                                                                                                |
| What are for you the perceived benefits of this approach implemented in your locality?                                                                                       | <p>Benefits regarding:</p> <ul style="list-style-type: none"> <li>• burden of wounds</li> <li>• community behavior towards wounds</li> <li>• use of local care (self-medication, traditional healer)</li> <li>• physical well-being and wound hygiene</li> </ul> <p>Based on your observations, what lessons have you learned from this experience.</p> |
| <b>Challenges observed</b>                                                                                                                                                   |                                                                                                                                                                                                                                                                                                                                                         |
| What challenges are you observing in terms of wound care, community behavior and adherence to care, in your locality the despite the CHW-based wound management implemented? | <p>At the household level:</p> <ul style="list-style-type: none"> <li>• beliefs/social representation</li> <li>• care seeking behavior</li> <li>• compliance with care</li> </ul>                                                                                                                                                                       |
| What challenges do you face in dealing with community health workers and their wound care?                                                                                   | <p>At the CHW level:</p> <ul style="list-style-type: none"> <li>• Follow-up of patients and households</li> <li>• Motivation to work</li> </ul>                                                                                                                                                                                                         |

|                                                                                                                                                                                                                        |                                                                                                                                                                                                                                                                                                                                                                                                                                                                                               |
|------------------------------------------------------------------------------------------------------------------------------------------------------------------------------------------------------------------------|-----------------------------------------------------------------------------------------------------------------------------------------------------------------------------------------------------------------------------------------------------------------------------------------------------------------------------------------------------------------------------------------------------------------------------------------------------------------------------------------------|
| <b>Target: Health staff (CHWs, Nurse assistant, Nurse, Physician)</b>                                                                                                                                                  |                                                                                                                                                                                                                                                                                                                                                                                                                                                                                               |
| <b>Research objectives</b>                                                                                                                                                                                             | <b>Themes covered</b>                                                                                                                                                                                                                                                                                                                                                                                                                                                                         |
| <b>General information</b>                                                                                                                                                                                             |                                                                                                                                                                                                                                                                                                                                                                                                                                                                                               |
| Age:                                                                                                                                                                                                                   | Profession:                                                                                                                                                                                                                                                                                                                                                                                                                                                                                   |
| Sexe:                                                                                                                                                                                                                  | Education level:                                                                                                                                                                                                                                                                                                                                                                                                                                                                              |
| <b>Attitude towards wounds in the community</b>                                                                                                                                                                        |                                                                                                                                                                                                                                                                                                                                                                                                                                                                                               |
| As health professional, what do attitudes towards wounds and care services look like currently in your community, compared with before the community-based wound care model with CHW was implemented in your locality? | <p>What are current community care practices toward wound and care services in this area?</p> <p>What is the current state of self-medication and the use of traditional therapists in your locality?</p> <p>Have perceptions around wounds and care seeking behaviors related to care changed or not since the wound model with CHW has been implemented?</p> <p><i>(Describe any change observed in attitudes in the community and related to the CHW based wound management model)</i></p> |
| <b>Perception of wound care provided by CHWs</b>                                                                                                                                                                       |                                                                                                                                                                                                                                                                                                                                                                                                                                                                                               |
| How do you perceive community health workers and their involvement in health issues?                                                                                                                                   | <p>Perceptions related to CHWs</p> <ul style="list-style-type: none"> <li>• Access</li> <li>• Availability</li> <li>• Relationship</li> <li>• Confidence</li> </ul>                                                                                                                                                                                                                                                                                                                           |

|                                                                                                                                                                                          |                                                                                                                                                                                                                                                                                                                                                                                                                                                  |
|------------------------------------------------------------------------------------------------------------------------------------------------------------------------------------------|--------------------------------------------------------------------------------------------------------------------------------------------------------------------------------------------------------------------------------------------------------------------------------------------------------------------------------------------------------------------------------------------------------------------------------------------------|
| What do you think about care provided at household level by-community health workers as part of the model implemented?                                                                   | <p>Perceptions related to CHWs treatment</p> <ul style="list-style-type: none"> <li>• Efficacy</li> <li>• Duration of care</li> <li>• Confidence</li> </ul> <p>How do you perceive community-based wound care with CHWs compared to care in standard health services (health center, district hospital)?</p>                                                                                                                                     |
| When and at which stage of wounds do community members most often seek care from community health workers in your area?                                                                  | <p>Recourse to CHWs care</p> <ul style="list-style-type: none"> <li>• Compliance with care</li> <li>• Self-recourse to CHWs</li> <li>• Decision criteria to seek care from CHWs</li> </ul>                                                                                                                                                                                                                                                       |
| <b>Perceived benefits of the treatment</b>                                                                                                                                               |                                                                                                                                                                                                                                                                                                                                                                                                                                                  |
| Has the CHWs based wound management made a difference your community regarding wounds issues ?                                                                                           | <ul style="list-style-type: none"> <li>• How is this perceptible?</li> </ul>                                                                                                                                                                                                                                                                                                                                                                     |
| What are the perceived benefits of implementing this approach in your locality?                                                                                                          | <p>Benefits regarding:</p> <ul style="list-style-type: none"> <li>• burden of wounds</li> <li>• community behavior towards wounds</li> <li>• use of local care (self-medication, traditional healer)</li> <li>• physical well-being and wound hygiene</li> </ul> <p>Based on your observations, what lessons have you learned from this CHWs based wound management model implemented to target wound early in community at household level?</p> |
| <b>Challenges observed</b>                                                                                                                                                               |                                                                                                                                                                                                                                                                                                                                                                                                                                                  |
| What challenges are you observing in terms of wound care, community behavior and adherence to care, in your locality despite the community based wound care model with CHWs implemented? | <p>At the household level:</p> <ul style="list-style-type: none"> <li>• beliefs/social representation</li> <li>• care seeking behavior</li> <li>• compliance with care</li> </ul>                                                                                                                                                                                                                                                                |
| What challenges CHWs face in wound care provided at household level in the community?                                                                                                    | <p>At the CHW level:</p> <ul style="list-style-type: none"> <li>• Follow-up of patients and households</li> <li>• Motivation to work</li> </ul>                                                                                                                                                                                                                                                                                                  |

---

|                                |                       |
|--------------------------------|-----------------------|
| <b>Target:</b> Former patients |                       |
| <b>Research objectives</b>     | <b>Themes covered</b> |
| <b>General information</b>     |                       |
| Age:                           | Profession:           |
| Sexe:                          | Education level:      |

| <b>Attitude towards wounds in the community</b>                                                                                                                                                                        |                                                                                                                                                                                                                                                                                                                                                                                                                                                                                                                                                                            |
|------------------------------------------------------------------------------------------------------------------------------------------------------------------------------------------------------------------------|----------------------------------------------------------------------------------------------------------------------------------------------------------------------------------------------------------------------------------------------------------------------------------------------------------------------------------------------------------------------------------------------------------------------------------------------------------------------------------------------------------------------------------------------------------------------------|
| What do attitudes towards wounds look like currently in your community, compared with before the community-based wound care model with CHW was implemented in your locality?                                           | <p>From your experience, how are wounds currently perceived or considered in your community?<br/>What are current community care practices toward wounds in the community?</p> <p>What is the current state of self-medication and the use of traditional therapists in your locality?</p> <p>Have perceptions around wounds and care seeking behaviors related to changed or not since the wound model with CHW have been implemented?</p> <p><i>(Describe any change observed in attitudes in the community and related to the CHW based wound management model)</i></p> |
| <b>Perception of wound care provided by CHWs</b>                                                                                                                                                                       |                                                                                                                                                                                                                                                                                                                                                                                                                                                                                                                                                                            |
| How do you perceive community health workers and their involvement in health issues?                                                                                                                                   | <p>Perceptions related to CHWs</p> <ul style="list-style-type: none"> <li>• Access</li> <li>• Availability</li> <li>• Relationship</li> <li>• Confidence</li> </ul>                                                                                                                                                                                                                                                                                                                                                                                                        |
| Tell us about the treatment you received within the community based wound care implemented here. What do you think of the care provided in the community-by-community health workers as part of the model implemented? | <p>Perceptions related to CHWs treatment</p> <ul style="list-style-type: none"> <li>• Efficacy</li> <li>• Duration of care</li> <li>• Confidence</li> </ul> <p>How do you perceive community-based wound care with CHWs compared to care in standard health services (health center, district hospital)?</p>                                                                                                                                                                                                                                                               |
| When at which stage of wounds do community members most often seek care from community health workers in your area?                                                                                                    | <p>Recourse to CHWs care</p> <ul style="list-style-type: none"> <li>• Compliance with care</li> <li>• Self-recourse to CHWs</li> <li>• Decision criteria to seek care from CHWs</li> </ul>                                                                                                                                                                                                                                                                                                                                                                                 |
| <b>Perceived benefits of the treatment</b>                                                                                                                                                                             |                                                                                                                                                                                                                                                                                                                                                                                                                                                                                                                                                                            |
| Has the community based wound management model with focus on CHWs made a difference your community regarding wounds issues ?                                                                                           | <ul style="list-style-type: none"> <li>• How is this perceptible?</li> </ul>                                                                                                                                                                                                                                                                                                                                                                                                                                                                                               |
| What are for you the perceived benefits of the community based wound management model with focus on CHWs implemented your locality?                                                                                    | <p>Benefits regarding:</p> <ul style="list-style-type: none"> <li>• burden of wounds</li> <li>• community behavior towards wounds</li> <li>• use of local care (self-medication, traditional healer)</li> <li>• physical well-being and wound hygiene</li> </ul> <p>Based on your observations, what lessons have you learned from this community based wound care approach implemented to target wound early in community with CHW?</p>                                                                                                                                   |
| <b>Challenges observed</b>                                                                                                                                                                                             |                                                                                                                                                                                                                                                                                                                                                                                                                                                                                                                                                                            |

|                                                                                                                                                                                          |                                                                                                                                                                            |
|------------------------------------------------------------------------------------------------------------------------------------------------------------------------------------------|----------------------------------------------------------------------------------------------------------------------------------------------------------------------------|
| What challenges are you observing in terms of wound care, community behavior and adherence to care, in your locality despite the community based wound care model with CHWs implemented? | At the household level: <ul style="list-style-type: none"> <li>• beliefs/social representation</li> <li>• care seeking behavior</li> <li>• compliance with care</li> </ul> |
| What challenges do you face in dealing with community health workers and their wound care?                                                                                               | At the CHW level: <ul style="list-style-type: none"> <li>• Follow-up of patients and households</li> <li>• Motivation to work</li> </ul>                                   |

|                                                                                                                                                                              |                                                                                                                                                                                                                                                                                                                                                                                                                                                                                                                                                                                                                                                   |
|------------------------------------------------------------------------------------------------------------------------------------------------------------------------------|---------------------------------------------------------------------------------------------------------------------------------------------------------------------------------------------------------------------------------------------------------------------------------------------------------------------------------------------------------------------------------------------------------------------------------------------------------------------------------------------------------------------------------------------------------------------------------------------------------------------------------------------------|
| <b>Target: Traditional healers</b>                                                                                                                                           |                                                                                                                                                                                                                                                                                                                                                                                                                                                                                                                                                                                                                                                   |
| <b>Research objectives</b>                                                                                                                                                   | <b>Themes covered</b>                                                                                                                                                                                                                                                                                                                                                                                                                                                                                                                                                                                                                             |
| <b>General information</b>                                                                                                                                                   |                                                                                                                                                                                                                                                                                                                                                                                                                                                                                                                                                                                                                                                   |
| Age:                                                                                                                                                                         | Profession:                                                                                                                                                                                                                                                                                                                                                                                                                                                                                                                                                                                                                                       |
| Sexe:                                                                                                                                                                        | Education level:                                                                                                                                                                                                                                                                                                                                                                                                                                                                                                                                                                                                                                  |
| <b>Attitude towards wounds in the community</b>                                                                                                                              |                                                                                                                                                                                                                                                                                                                                                                                                                                                                                                                                                                                                                                                   |
| What do attitudes towards wounds look like currently in your community, compared with before the community-based wound care model with CHW was implemented in your locality? | <p>Can you tell us about the current state of traditional wound care in the community?</p> <p>How often do people turn currently to your treatment for wound care in the community?</p> <p>How are wounds currently perceived or considered in your community?</p> <p>What are currently community care practices toward wounds in the community?</p> <p>Have perceptions around wounds and traditional care seeking behaviors for wounds care changed or not since the wound model with CHW implemented here?</p> <p><i>(Describe any change observed in attitudes in the community and related to the CHW based wound management model)</i></p> |
| <b>Perception of wound care provided by CHWs</b>                                                                                                                             |                                                                                                                                                                                                                                                                                                                                                                                                                                                                                                                                                                                                                                                   |
| What do you know about the community based wound management model with CHW implemented in this community?                                                                    | Are you involved in?                                                                                                                                                                                                                                                                                                                                                                                                                                                                                                                                                                                                                              |
| What do you know about CHW and their involvement in Health issues?                                                                                                           | Perceptions related to CHWs <ul style="list-style-type: none"> <li>• Access</li> <li>• Availability</li> <li>• Relationship</li> <li>• Confidence</li> </ul>                                                                                                                                                                                                                                                                                                                                                                                                                                                                                      |
| What are for you the perceived benefits of the community based wound management model with focus on CHWs implemented your locality?                                          | Perceptions related to CHWs treatment <ul style="list-style-type: none"> <li>• Efficacy</li> <li>• Duration of care</li> <li>• Confidence</li> </ul>                                                                                                                                                                                                                                                                                                                                                                                                                                                                                              |
| <b>Perceived benefits of the treatment</b>                                                                                                                                   |                                                                                                                                                                                                                                                                                                                                                                                                                                                                                                                                                                                                                                                   |

|                                                                                                                                                                                                 |                                                                                                                                                                                                                                                                                                                                                                                                           |
|-------------------------------------------------------------------------------------------------------------------------------------------------------------------------------------------------|-----------------------------------------------------------------------------------------------------------------------------------------------------------------------------------------------------------------------------------------------------------------------------------------------------------------------------------------------------------------------------------------------------------|
| <p>Has the community based wound management model with focus on CHWs made a difference your community regarding wounds issues ?</p>                                                             | <ul style="list-style-type: none"> <li>• How is this perceptible?</li> </ul>                                                                                                                                                                                                                                                                                                                              |
| <p>What are the benefits of implementing this community approach focusing on early identification of wounds by CHWs at household level?</p>                                                     | <p>Benefits regarding:</p> <ul style="list-style-type: none"> <li>• burden of wounds</li> <li>• community behavior towards wounds</li> <li>• use of local care (self-medication, traditional healer)</li> <li>• physical well-being and wound hygiene</li> </ul> <p>Based on your observations, what lessons have you learned about this community based wound care with CHW you're your perspective?</p> |
| <p><b>Challenges observed</b></p>                                                                                                                                                               |                                                                                                                                                                                                                                                                                                                                                                                                           |
| <p>What challenges are you observing in terms of wound care, community behavior and adherence to care, in your locality despite the community based wound care model with CHWs implemented?</p> | <p>At the household level:</p> <ul style="list-style-type: none"> <li>• beliefs/social representation</li> <li>• care seeking behavior</li> <li>• compliance with care</li> </ul>                                                                                                                                                                                                                         |
| <p>What challenges do you face in dealing with community health workers and their wound care?</p>                                                                                               | <p>At the CHW level:</p> <ul style="list-style-type: none"> <li>• Follow-up of patients and households</li> <li>• Motivation to work</li> </ul>                                                                                                                                                                                                                                                           |
