# Supplementary material
Source: Research Square preprint supplement (doi:10.21203/rs.3.rs-7528753/v1)
Supplement: Supplementary file 2 [file c49950092199a6adee74babf.pdf]

## **FOCUS GROUP DISCUSSION GUIDE**

|                                                                                                                                                            |                                                                                                                                                                                                                                                                                                                                                                |
|------------------------------------------------------------------------------------------------------------------------------------------------------------|----------------------------------------------------------------------------------------------------------------------------------------------------------------------------------------------------------------------------------------------------------------------------------------------------------------------------------------------------------------|
| <i>Target : Adolescent, Adults (men/women)</i>                                                                                                             |                                                                                                                                                                                                                                                                                                                                                                |
| <b>Research objectives</b>                                                                                                                                 | <b>Themes covered/relaunch questions</b>                                                                                                                                                                                                                                                                                                                       |
| <b>General information</b>                                                                                                                                 |                                                                                                                                                                                                                                                                                                                                                                |
| Age:                                                                                                                                                       | Profession:                                                                                                                                                                                                                                                                                                                                                    |
| Sexe:                                                                                                                                                      | Education level:                                                                                                                                                                                                                                                                                                                                               |
| <b>Attitude towards wounds in the community</b>                                                                                                            |                                                                                                                                                                                                                                                                                                                                                                |
| How do you currently use to manage wounds when it occur ?                                                                                                  | Which treatment do you use to request? Why?<br>What is your perception of wounds as a health issue?                                                                                                                                                                                                                                                            |
| What do attitudes towards wounds look like currently in your community, compared with before wound care provided by CHWs was implemented in your locality? | Have perceptions around wounds and care seeking behaviors related to wounds changed or not since wound care provided by CHWs was implemented in your locality?<br><br>What are the main factors driving your perceptions of wound care seeking practises you seek for in the community ?<br><br><i>(describe any change observed and related to the model)</i> |
| <b>Perception of wound care provided by CHWs</b>                                                                                                           |                                                                                                                                                                                                                                                                                                                                                                |
| How do you perceive community health workers and their involvement in health issues?                                                                       | Perceptions related to CHWs <ul style="list-style-type: none"> <li>• Access</li> <li>• Availability</li> <li>• Relationship</li> <li>• Confidence</li> </ul>                                                                                                                                                                                                   |
| What do you think of the care provided at household level by-community health workers as part of the model implemented?                                    | Perceptions related to CHWs treatment <ul style="list-style-type: none"> <li>• Efficacy</li> <li>• Duration of care</li> <li>• Confidence</li> </ul> How do you perceive community-based wound care with CHWs compared to care in standard health services (health center, district hospital)?                                                                 |
| When at which stage of wounds do you most often seek care from community health workers in your area?                                                      | Recourse to CHWs care <ul style="list-style-type: none"> <li>• Compliance with care</li> <li>• Self-recourse to CHWs</li> <li>• Decision criteria to seek care from CHWs</li> </ul>                                                                                                                                                                            |
| <b>Perceived benefits of the treatment</b>                                                                                                                 |                                                                                                                                                                                                                                                                                                                                                                |
| Has CHW-based wound management made a difference your community regarding wounds issues?                                                                   | <ul style="list-style-type: none"> <li>• If so, how is this perceptible?</li> </ul>                                                                                                                                                                                                                                                                            |
| What are for you the perceived benefits of wound care provided at community level by CHWs?                                                                 | Benefits regarding: <ul style="list-style-type: none"> <li>• burden of wounds</li> <li>• community behavior towards wounds</li> <li>• use of local care (self-medication, traditional healer)</li> </ul>                                                                                                                                                       |

|                                                                                                                                                          |                                                                                                                                                                                   |
|----------------------------------------------------------------------------------------------------------------------------------------------------------|-----------------------------------------------------------------------------------------------------------------------------------------------------------------------------------|
|                                                                                                                                                          | <ul style="list-style-type: none"> <li>• physical well-being and wound hygiene</li> </ul> <p>Based on your observations, what lessons have you learned from this experience?</p>  |
| <b>Challenges observed</b>                                                                                                                               |                                                                                                                                                                                   |
| What challenges are you observing in terms of wound care, community behavior and adherence to care, in your locality despite CHW-based wound management? | <p>At the household level:</p> <ul style="list-style-type: none"> <li>• beliefs/social representation</li> <li>• care seeking behavior</li> <li>• compliance with care</li> </ul> |
| What challenges do you face in dealing with community health workers and their wound care?                                                               | <p>At the CHW level:</p> <ul style="list-style-type: none"> <li>• Follow-up of patients and households</li> <li>• Motivation to work</li> </ul>                                   |
