# Supplementary material
Source: Research Square preprint supplement (doi:10.21203/rs.3.rs-7528753/v1)
Supplement: Supplementary file 3 [file f6f213e84128eca65d0552c9.pdf]

**HOUSEHOLD QUESTIONNAIRE**

| Questions                                                          | Variables and modalities                                                                                                                                                                                                                                                                                                                                                                                                                                                                                                                                                  |
|--------------------------------------------------------------------|---------------------------------------------------------------------------------------------------------------------------------------------------------------------------------------------------------------------------------------------------------------------------------------------------------------------------------------------------------------------------------------------------------------------------------------------------------------------------------------------------------------------------------------------------------------------------|
| <b><u>Household head name:</u></b>                                 | <b><u>Household head HDSS ID:</u></b>                                                                                                                                                                                                                                                                                                                                                                                                                                                                                                                                     |
| <b>Sociodemographic and economic characteristics of households</b> | <p><b>Demographic</b></p> <ul style="list-style-type: none"> <li>• Age<br/>.....</li> <li>• Sex<br/>F<br/>M</li> <li>• Education<br/>No formal<br/>Primary<br/>Secondary<br/>Higher school</li> <li>• <b>Marital status</b><br/>Single<br/>Common-law or cohabitation<br/>Married<br/>Divorced<br/>Widowed</li> <li>• <b>Household size</b><br/>1-3<br/>4-7<br/>≥8</li> </ul> <p><b>Economic</b></p> <ul style="list-style-type: none"> <li>• <b>Profession</b><br/>Farmer (crop/livestock)<br/>Private company employee<br/>Civil servant<br/>Tradesman/woman</li> </ul> |

|                                                                                                            |                                                                                                                                                                                                                                                                    |
|------------------------------------------------------------------------------------------------------------|--------------------------------------------------------------------------------------------------------------------------------------------------------------------------------------------------------------------------------------------------------------------|
|                                                                                                            | <p>Fisherman/woman</p> <p>Jobless</p> <p>Inactive</p> <p>Other</p> <ul style="list-style-type: none"> <li>• <b>Household income</b></li> </ul> <p>No direct income</p> <p>1-250 000 FCFA</p> <p>250 001-500 000 FCFA</p> <p>&gt;500 000 FCFA</p> <p>Don't know</p> |
| <b>Attitudes towards wounds in the community</b>                                                           |                                                                                                                                                                                                                                                                    |
| Do you usually consider wounds to be diseases?                                                             | <ul style="list-style-type: none"> <li>• Yes</li> <li>• No</li> </ul>                                                                                                                                                                                              |
| Are wounds a priority health problem for you in your household?                                            | <ul style="list-style-type: none"> <li>• Yes</li> <li>• No</li> </ul>                                                                                                                                                                                              |
| When do you or your household members usually seek care from CHW when wounds occur?                        | <ul style="list-style-type: none"> <li>• As soon as the wound appears</li> <li>• When the wound becomes painful</li> <li>• When the wound increases in size</li> </ul>                                                                                             |
| <b>Perception of wound care provided by CHWs including satisfaction, perceived benefits and challenges</b> |                                                                                                                                                                                                                                                                    |
| Did you or a member of your household experience wound care with CHWs since the CBWM is implemented?       | <ul style="list-style-type: none"> <li>• Yes, care received with CHWs</li> <li>• No, no care received with CHWs</li> </ul>                                                                                                                                         |
| If yes, what is your opinion about wound care delivered by the CHWs?                                       | <ul style="list-style-type: none"> <li>• Satisfied</li> <li>• Not satisfied</li> </ul>                                                                                                                                                                             |

|                                                                  |                                                                                                                                                                                                                                                                                                                                                                   |
|------------------------------------------------------------------|-------------------------------------------------------------------------------------------------------------------------------------------------------------------------------------------------------------------------------------------------------------------------------------------------------------------------------------------------------------------|
| <p>If satisfied, what are the reasons for your satisfaction?</p> | <ul style="list-style-type: none"> <li>• Fast healing of wounds<br/>Yes<br/>No</li> <li>• availability of CHWs<br/>Yes<br/>No</li> <li>• sociability of CHWs<br/>Yes<br/>No</li> <li>• sensitivity of CHWs<br/>Yes<br/>No</li> <li>• appropriate speed of care delivery<br/>Yes<br/>No</li> </ul>                                                                 |
| <p>If not satisfied, what are the reasons?</p>                   | <ul style="list-style-type: none"> <li>• No visit to the household by CHW<br/>Yes<br/>No</li> <li>• No wounds in the household<br/>Yes<br/>No</li> <li>• Unaware of community care with CHW<br/>Yes<br/>No</li> <li>• No confidence in the CHW ability to provide care<br/>Yes<br/>No</li> <li>• Seeking care directly at health center<br/>Yes<br/>No</li> </ul> |

|                                                                                                                                                                      |                                                                                                                                                                                                                                                                                  |
|----------------------------------------------------------------------------------------------------------------------------------------------------------------------|----------------------------------------------------------------------------------------------------------------------------------------------------------------------------------------------------------------------------------------------------------------------------------|
|                                                                                                                                                                      | Don't know                                                                                                                                                                                                                                                                       |
| In your opinion, has the implementation of community-based wound care with CHWs brought benefits to your community?                                                  | <ul style="list-style-type: none"> <li>• Yes</li> <li>• No</li> <li>• Don't know</li> </ul>                                                                                                                                                                                      |
| If yes, what are the main perceived benefits of this care model for you?                                                                                             | <ul style="list-style-type: none"> <li>• Reduction of severe cases<br/>Yes<br/>No</li> <li>• Early recourse to care<br/>Yes<br/>No</li> <li>• Trust in CHWs care<br/>Yes<br/>No</li> <li>• Physical well-being<br/>Yes<br/>No</li> <li>• Wound hygiene<br/>Yes<br/>No</li> </ul> |
| What type of challenges do you observe regarding wound care provided by community health workers within the community based wound management model implemented here? | <ul style="list-style-type: none"> <li>• Challenges regarding wounds perception, and compliance with care<br/>Yes<br/>No</li> <li>• Challenges related to CHWs care<br/>Yes<br/>No</li> </ul>                                                                                    |
